# Supplementary material
Source: MDPI journal article supplement (https://www.mdpi.com/2076-3417/13/12/7209)
Supplement: s1 [file s1]

### Supplementary Material

We searched trial registers using the (1) In PubMed, the search term was (golf [Title]) AND (swing OR biomechanics\* OR kinematic\* OR kinetic\* OR dynamic\* OR angle OR velocity\* OR speed OR torque OR moment OR force OR GRF OR mechanic\* OR power OR work OR energy\*);(2) In web of science the search term was (golf [TI]) AND (swing or biomechanics\* OR kinematic\* OR kinetic\* OR dynamic\* OR angle OR velocity\* OR speed OR torque OR moment OR force OR GRF OR mechanic\* OR power OR work OR energy\* [TS]);(3) In EBSCO, the search term was ([TI] golf) AND ([AB] swing or biomechanics\* OR kinematic\* OR kinetic\* OR dynamic\* OR angle OR velocity\* OR speed OR torque OR moment OR force OR GRF OR mechanic\* OR power OR work OR energy\*). The results of the database searches were entered into an EndNote X9 library. Duplicates were deleted using the deduplication function in EndNote X9. Two reviewers preferentially removed irrelevant records for selection based on the titles and abstracts. Thereafter, the reviewers checked the full texts to finally select the papers that meet the selection criteria.

Each database was searched under the above conditions:

1. PubMed (446)
  - Language: English (434)
  - species: Humans (323)
2. Web of science (1703)
  - Document type: journal article (1612)
  - Language: English (837)
3. Embase (4378)
  - Document type: journal article (952)
  - Language: English (837)

(This database has a duplicate record when you reach the last record. This is the result of deleting duplicate records.)
